# Supplementary material for: Inactivation of Individual SeqA Binding Sites of the E. coli Origin Reveals Robustness of Replication Initiation Synchrony
Source: PubMed Central journal article supplement (PMC5145175; doi:10.1371/journal.pone.0166722), 2016-12-08
Supplement: pone.0166722.s001.pdf [file pone.0166722.s001.pdf]

# Inactivation of Individual SeqA Binding Sites of the *E. coli* Origin Reveals Robustness of Replication Initiation Synchrony

Jyoti K Jha, Dhruba K Chattoraj

## Supporting Information S File

**Table A. Bacterial strains.**

| Name                             | Genotype                                                                   | Drug <sup>R</sup> | Number  | Reference                            |
|----------------------------------|----------------------------------------------------------------------------|-------------------|---------|--------------------------------------|
| MG1655                           | <i>E. coli</i> K-12 F <sup>-</sup> λ <sup>-</sup> <i>ilvG rfb-50 rph-1</i> |                   | BR1703  | [1]                                  |
| MG1655 <i>ΔseqA10</i>            | BR1703 <i>ΔseqA10</i>                                                      |                   | BR1704  | [2]                                  |
| MG1655 mini-λ Tet                | BR1703 mini-λ Tet                                                          | Tc                | CVC1394 | [3];<br>Figs 4 and 5;<br>Figures A-C |
| MG1655 <i>ΔseqA10</i> mini-λ Tet | BR1704 mini-λ Tet                                                          | Tc                | CVC2064 | Figures A-C                          |
| <i>Δdam::Tn9</i>                 | NS2655 <i>galΔdam::Tn9 λi21 P1:7 cI+ galETΔK</i>                           | Cm                | BR2786  | N. Sternberg;<br>Figure A            |
| <i>oriC-zeo</i>                  | BR1703 <i>oriC-zeo</i>                                                     |                   | CVC2073 | Figs 4 and 5;<br>Figures A and C     |
| „ #1                             | „ #1                                                                       | Zeo               | CVC2142 | Figures A and C                      |
| „ #2                             | „ #2                                                                       |                   | CVC2143 |                                      |
| „ #3                             | „ #3                                                                       |                   | CVC2144 |                                      |
| „ #4                             | „ #4                                                                       |                   | CVC2145 |                                      |
| „ #5                             | „ #5                                                                       |                   | CVC2150 |                                      |
| „ #6                             | „ #6                                                                       |                   | CVC2151 |                                      |
| „ #7                             | „ #7                                                                       |                   | CVC2152 |                                      |
| „ #8                             | „ #8                                                                       |                   | CVC2153 |                                      |
| „ #9                             | „ #9                                                                       |                   | CVC2075 |                                      |
| <i>oriC-zeoΔseqA</i>             | BR1704 <i>oriC-zeo</i>                                                     |                   | CVC2092 | Figures A and C                      |
| „ #1                             | „ #1                                                                       | Zeo               | CVC2146 |                                      |
| „ #2                             | „ #2                                                                       |                   | CVC2147 |                                      |
| „ #3                             | „ #3                                                                       |                   | CVC2148 |                                      |
| „ #4                             | „ #4                                                                       |                   | CVC2149 |                                      |
| „ #5                             | „ #5                                                                       |                   | CVC2154 |                                      |
| „ #6                             | „ #6                                                                       |                   | CVC2155 |                                      |
| „ #7                             | „ #7                                                                       |                   | CVC2156 |                                      |
| „ #8                             | „ #8                                                                       |                   | CVC2157 |                                      |
| „ #9                             | „ #9                                                                       |                   | CVC2094 |                                      |
| <i>oriC-FRT</i>                  | BR1703 <i>oriC-FRT</i>                                                     |                   | CVC2239 | Figs 2 and 3;<br>Figures A and B     |
| „ #1                             | „ #1                                                                       |                   | CVC2240 |                                      |
| „ #2                             | „ #2                                                                       |                   | CVC2241 |                                      |
| „ #3                             | „ #3                                                                       |                   | CVC2242 |                                      |
| „ #4                             | „ #4                                                                       |                   | CVC2243 |                                      |

|                                  |                             |  |         |                           |
|----------------------------------|-----------------------------|--|---------|---------------------------|
| „ #5                             | „ #5                        |  | CVC2244 |                           |
| „ #6                             | „ #6                        |  | CVC2245 |                           |
| „ #7                             | „ #7                        |  | CVC2246 |                           |
| „ #8                             | „ #8                        |  | CVC2247 |                           |
| „ #9                             | „ #9                        |  | CVC2248 |                           |
| <b><i>oriC-FRTΔseqA</i></b>      |                             |  |         |                           |
| <i>oriC-FRTΔseqA</i>             | BR1704 <i>oriC-FRT</i>      |  | CVC2249 | Fig 2: Figures A, B and D |
| „ #1                             | „ #1                        |  | CVC2250 |                           |
| „ #2                             | „ #2                        |  | CVC2251 |                           |
| „ #3                             | „ #3                        |  | CVC2252 |                           |
| „ #4                             | „ #4                        |  | CVC2253 |                           |
| „ #5                             | „ #5                        |  | CVC2254 |                           |
| „ #6                             | „ #6                        |  | CVC2255 |                           |
| „ #7                             | „ #7                        |  | CVC2256 |                           |
| „ #8                             | „ #8                        |  | CVC2257 |                           |
| „ #9                             | „ #9                        |  | CVC2258 |                           |
| <b><i>oriC-zeo GATC→GTTC</i></b> |                             |  |         |                           |
| <i>oriC-zeo GATC→GTTC</i> #1     | CVC2073 <i>GATC→GTTC</i> #1 |  | CVC2901 | Fig 4: Figure E           |
| „ #2                             | „ #2                        |  | CVC2902 |                           |
| „ #3                             | „ #3                        |  | CVC2903 |                           |
| „ #4                             | „ #4                        |  | CVC2904 |                           |
| „ #5                             | „ #5                        |  | CVC2905 |                           |
| „ #6                             | „ #6                        |  | CVC2906 | Figs 4 and 5; Figure E    |
| „ #7                             | „ #7                        |  | CVC2907 | Fig 4: Figure E           |
| „ #8                             | „ #8                        |  | CVC2908 |                           |
| „ #9                             | „ #9                        |  | CVC2909 |                           |
| „ #5-6                           | „ #5-6                      |  | CVC2910 |                           |
| „ #8-9                           | „ #8-9                      |  | CVC2911 |                           |
| „ #7-9                           | „ #7-9                      |  | CVC2912 |                           |
| „ #6-9                           | „ #6-9                      |  | CVC2913 |                           |
| <i>oriC-zeo GATC→GATG</i> #6     | CVC2073 <i>GATC→GATG</i> #6 |  | CVC2914 | Fig 5                     |
| <i>oriC-zeo GATC→GAAC</i> #6     | CVC2073 <i>GATC→GAAC</i> #6 |  | CVC2915 |                           |

**Table B. Plasmids.**

| Name     | Genotype                             | Drug <sup>R</sup> | Reference                         |
|----------|--------------------------------------|-------------------|-----------------------------------|
| pEM7-Zeo |                                      |                   | Invitrogen                        |
| pJJ04    | pEM7- <i>zeo-oriC</i> (3925738-4038) |                   | Figs 2 and 3; Figures A, B, and D |
| pJJ06    | pJJ04 GA→TC(3925759-60) #1           |                   |                                   |
| pJJ40    | „ AA→TC(3925774-75) #2               |                   |                                   |
| pJJ41    | „ AG→TC(3925787-88) #3               |                   |                                   |
| pJJ46    | „ GT→TC(3925827-28) #4               |                   |                                   |
| pJJ47    | „ AG→TC(3925845-46) #5               |                   |                                   |
| pJJ48    | „ AT→TC(3925863-64) #6               |                   |                                   |
| pJJ49    | „ GT→TC(3925870-71) #7               |                   |                                   |
| pJJ55    | „ GG→TC(3925892-93) #8               |                   |                                   |
| pJJ07    | „ TT→TC(3925960-61) #9               |                   |                                   |
| pJJ385   | pJJ04 GATC→GTTC #1                   |                   | Fig 4                             |
| pJJ386   | „ GATC→GTTC #2                       | Ap, Zeo           |                                   |

|                     |                                                 |        |                             |
|---------------------|-------------------------------------------------|--------|-----------------------------|
| pJJ387              | „ GATC-GTTC #3                                  |        |                             |
| pJJ388              | „ GATC-GTTC #3*                                 |        |                             |
| pJJ389              | „ GATC-GTTC #4                                  |        |                             |
| pJJ379              | „ GATC-GTTC #5                                  |        |                             |
| pJJ391              | „ GATC-GTTC #6                                  |        |                             |
| pJJ369              | „ GATC-GTTC #7                                  |        |                             |
| pJJ370              | „ GATC-GTTC #8                                  |        |                             |
| pJJ371              | „ GATC-GTTC #9                                  |        |                             |
| pJJ372              | „ GATC-GTTC #8-9                                |        |                             |
| pJJ374              | „ GATC-GTTC #7-9                                |        |                             |
| pJJ377              | „ GATC-GTTC #6-9                                |        |                             |
| pJJ390              | „ GATC-GTTC #5-6                                |        |                             |
| pJJ415              | „ GATC-GATG #6                                  |        |                             |
| pJJ416              | „ GATC-GAAC #6                                  |        |                             |
|                     |                                                 |        |                             |
| pJEL109             | MiniR1                                          | Ap     | [4]; Fig 3; Figure D        |
| pMOR1               | MiniR1- <i>datA</i>                             | Ap     | [5]; Fig 3; Figure D        |
| pRFB105             | pUC <i>ori</i>                                  | Ap, Kn | Figs 2 and 3; Figure D      |
| pSIM5               | pSC101 <i>ori</i> ; Carries $\lambda$ red genes | Ap     | [6]; Figs 2 and 3; Figure D |
| pCP20               | Supplies flp recombinase                        | Ap, Cm | [7]; Figs 2 and 3; Figure D |
| mini- $\lambda$ tet | Carries $\lambda$ red genes                     | Tc     | [3]                         |

**Table C. Primers**

| Name  | Sequence                                                            | Used in                            |
|-------|---------------------------------------------------------------------|------------------------------------|
| jj07  | AGATCTATTTATTTA <b>TC</b> GATCTGTTCTATTGTGATC                       | pJJ06                              |
| jj08  | ACAATAGAACAGATC <b>GA</b> TAAATAAATAGATCTTCT                        |                                    |
| jj09  | GGATAACTACCGG <b>TC</b> GATCCAAGCTTCCTGACA                          |                                    |
| jj10  | GGAAGCTTGGATC <b>GA</b> CCGGTAGTTATCCAAAGA                          | pJJ07                              |
| jj15  | CTTAGGATCCAGACCTGGGATCCTGGGTAT                                      | pJJ04                              |
| jj16  | TTAGGAATTCAATAAGTATACAGATCGTGCG                                     |                                    |
| jj21  | TGGGATCGTGGGTTAATTTACTCAAATAAGTATACAGATCGCG<br>ATATCGCTAGCTCGAGCACG | transfer of <i>oriC</i><br>mutants |
| jj35  | GGATTCTACTCAACTTTGTTCGGCTTGAGAAAGACCTGGGATCCT<br>GGGTATTAAAAAGA     |                                    |
| jj40  | GATATTGTGTGTCAAAGCAGAGTCT                                           | <i>oriC</i> probe                  |
| jj41  | GGATCCCAGGTCTTTCTCAAGCCGA                                           |                                    |
| jj42  | GAGGCAGAACTCAAAAATTCCGGTG                                           | <i>oriC</i> flanking primer        |
| jj81  | CTGTTCTATT <b>TC</b> GATCTCTTATTAGGATCG                             | pJJ40                              |
| jj82  | CTAATAAGAGATCGAAATAGAACAGATCTC                                      |                                    |
| jj85  | TTGTGATCTCTTATT <b>TC</b> GATCGCACTGCCCTGTGG                        | pJJ41                              |
| jj86  | CACAGGGCAGTGCATC <b>GA</b> AATAAGAGATCACAATAG                       |                                    |
| jj88  | CTTATCCACAAAGATC <b>GA</b> GCTCCTTAATAGTAGATCT                      |                                    |
| jj93  | CAAGGATCCGGCTTTTT <b>TC</b> GATCAACAACCTGGAAAGG                     | pJJ46                              |
| jj94  | TCCAGTTGTTGATC <b>GA</b> AAAAAGCCGGATCCTTGTATC                      |                                    |
| jj97  | GATCAACAACCTGGAA <b>TC</b> GATCATTAAGTGAATG                         | pJJ47                              |
| jj98  | TTCACAGTTAATGATC <b>GA</b> TTCCAGGTTGTTGATCT                        |                                    |
| jj101 | GGATCATTAAGTGTGAT <b>TC</b> GATCGGTGATCCTGGACCG                     | pJJ48                              |
| jj102 | CCAGGATCACCGATC <b>GA</b> TCACAGTTAATGATCC                          |                                    |

|       |                                                                      |                                            |
|-------|----------------------------------------------------------------------|--------------------------------------------|
| jj105 | AACTGTGAATGATCGTCGATCCTGGACCGTATAAGC                                 | pJJ49                                      |
| jj106 | CTTATACGGTCCAGGATCGACGATCATTACAGTTAATG                               |                                            |
| jj107 | CTGGACCGTATAAGCTTCGATCAGAATGAGGGTTATAC                               | pJJ54                                      |
| jj108 | ACCCCTCATTCTGATCGAAGCTTATACGGTCCAGG                                  |                                            |
| jj122 | TCCGGATAAAACATGGTGATTGC                                              | <i>oriC</i> sequencing                     |
| jj168 | ATCATCAGGTTGCGTTGGTTCTC                                              | <i>oriC</i> probe for HphI<br>HM detection |
| jj169 | ATGTTTTATCCGGATCCTTTTGAC                                             |                                            |
| jj184 | ACAGAGTTATCCACAGTAGATCGCACGATCTGTATACTTATTTA<br>TCCTCCTTAGTTCCTATTCC | For amplifying <i>FRT-Kn-FRT</i> cassette  |
| jj185 | ATCCGGCAGAAGAATGGCTGGGATCGTGGGTTAATTTACTCATT<br>GTGTAGGCTGGAGCTGCTTC |                                            |
| jj193 | CCTGTATGTGGTGGATGAAGC                                                | <i>lacZ</i> probe                          |
| jj194 | CAGATTTGATCCAGCGATAC                                                 |                                            |
| jj507 | GAATGATCGGTGTCCTGGACCGTATAAGCTG                                      | pJJ369, 373, 374                           |
| jj508 | ACGGTCCAGGAACACCGATCATTACAGTTAATG                                    |                                            |
| jj509 | CCGTATAAGCTGGGTCAGAATGAGGGTTATAC                                     | pJJ370                                     |
| jj510 | CCTCATTCTGAACCCAGCTTATACGGTCCAG                                      |                                            |
| jj511 | TAACCTACCGGTTGTCCAAGCTCCTGACAGAG                                     | pJJ371, 372                                |
| jj512 | CAGGAAGCTTGGAACAACCGGTAGTTATCCAAAG                                   |                                            |
| jj522 | CAACCTGGAAAGGTCATTAAGTGTGAATG                                        | pJJ379                                     |
| jj523 | CAGTTAATGAACCTTCCAGGTTGTTGATC                                        |                                            |
| jj529 | TAACCTGTGAATGTTGCGGTGATCCTGGACCG                                     | pJJ390,391                                 |
| jj530 | AGGATCACCGAACATTCACAGTTAATGA                                         |                                            |
| jj531 | CTATTTATTTAGAGTCTCTGTTCTATTGTGATCTC                                  | pJJ385                                     |
| jj532 | CACAATAGAACAGAACTCTAAATAAATAGATCTTC                                  |                                            |
| jj533 | GTTCTATTGTGTTCTCTTATTAGGATCGCAC                                      | pJJ386                                     |
| jj534 | TCCTAATAAGAGAACACAATAGAACAGATCTC                                     |                                            |
| jj535 | CTCTTATTAGGTCGCACTGCCCTGTGGA                                         | pJJ387                                     |
| jj536 | GGCAGTGCGAACCTAATAAGAGATCACAATAG                                     |                                            |
| jj537 | GTGGATAACAAGGTCCGGCTTTTAAGATCAAC                                     | pJJ388                                     |
| jj538 | CTTAAAAGCCGGAACCTTGTTATCCACAGGGC                                     |                                            |
| jj554 | GTGAATGATGGGTGATCCTGGACCGTATAAG                                      | pJJ415                                     |
| jj555 | CAGGATCACCCATCATTACAGTTAATG                                          |                                            |
| jj556 | TAACCTGTGAATGACGGTGATCCTGGACCG                                       | pJJ416                                     |
| jj557 | CCAGGATCACCGTTCATTACAGTTAATG                                         |                                            |

**Table D. Cell cycle parameters of *oriC-FRT* mutants with TaqI sites carrying R1 plasmid<sup>a</sup>.**

| TaqI site next to GATC | Gen. Time (min) | Origin/Cell | Cell Mass | Origin/Cell Mass | Asyn. Index (%) | Frac. of Uninitiated Cells | Initiation Mass |
|------------------------|-----------------|-------------|-----------|------------------|-----------------|----------------------------|-----------------|
| None (WT)              | 32.2            | 3.05        | 1         | 1                | 2.9             | 0.13                       | 0.38            |
| #1                     | 32.6            | 3.09        | 0.97      | 1.05             | 9.3             | 0.13                       | 0.36            |
| #2                     | 33.1            | 3.18        | 0.93      | 1.12             | 6.9             | 0.19                       | 0.41            |
| #3                     | 31.9            | 3.0         | 0.93      | 1.05             | 14.9            | 0.21                       | 0.41            |
| #4                     | 32.6            | 3.05        | 0.96      | 1.03             | 3.5             | 0.15                       | 0.36            |
| #5                     | 31.8            | 2.99        | 1.05      | 0.93             | 3.5             | 0.24                       | 0.40            |
| #6                     | 30.5            | 2.96        | 0.97      | 1.0              | 10.2            | 0.26                       | 0.37            |
| #7                     | 32.5            | 2.92        | 0.94      | 1.01             | 10.3            | 0.27                       | 0.44            |
| #8                     | 32.6            | 2.97        | 0.92      | 1.05             | 4.8             | 0.13                       | 0.36            |
| #9                     | 34.4            | 3.33        | 0.90      | 1.21             | 3.6             | 0.18                       | 0.36            |

<sup>a</sup> Other than the generation times, cell cycle parameters were derived from Fig 3A.

**Table E. Cell cycle parameters of *oriC-FRT* mutants with TaqI sites carrying R1-*datA*<sup>a</sup>.**

| TaqI site next to GATC | Gen. Time (min) | Origin/Cell | Cell Mass | Origin/Cell Mass <sup>b</sup> | Asyn. index (%) | Frac. of Uninitiated Cells | Initiation Mass |
|------------------------|-----------------|-------------|-----------|-------------------------------|-----------------|----------------------------|-----------------|
| None (WT)              | 36.3            | 2.55        | 1.02      | 0.82                          | 1.7             | 0.45                       | 0.41            |
| #1                     | 35.5            | 3.14        | 0.93      | 1.11                          | 9.1             | 0.20                       | 0.37            |
| #2                     | 37.4            | 2.28        | 0.99      | 0.76                          | 3.2             | 0.54                       | 0.43            |
| #3                     | 34.1            | 2.90        | 0.97      | 0.98                          | 11.6            | 0.24                       | 0.38            |
| #4                     | 34.1            | 3.03        | 0.88      | 1.13                          | 3.5             | 0.26                       | 0.41            |
| #5                     | 34.4            | 2.48        | 0.99      | 0.82                          | 2.1             | 0.44                       | 0.39            |
| #6                     | 31.5            | 2.33        | 1.05      | 0.73                          | 3.6             | 0.53                       | 0.45            |
| #7                     | 32.7            | 2.57        | 1.02      | 0.83                          | 4.2             | 0.40                       | 0.41            |
| #8                     | 32.3            | 3.01        | 0.99      | 1.00                          | 3.5             | 0.39                       | 0.38            |
| #9                     | 37.7            | 2.77        | 1.07      | 0.85                          | 3.4             | 0.40                       | 0.46            |

<sup>a</sup> Other than the generation times, cell cycle parameters were derived from Fig 3A.

<sup>b</sup> Values are normalized to 1 for the WT with R1 carrying cells of Table D.

1. Blattner FR, Plunkett G, 3rd, Bloch CA, Perna NT, Burland V, Riley M, et al. The complete genome sequence of *Escherichia coli* K-12. *Science*. 1997;277(5331):1453-74.
2. Slater S, Wold S, Lu M, Boye E, Skarstad K, Kleckner N. *E. coli* SeqA protein binds *oriC* in two different methyl-modulated reactions appropriate to its roles in DNA replication initiation and origin sequestration. *Cell*. 1995;82(6):927-36.
3. Court DL, Swaminathan S, Yu D, Wilson H, Baker T, Bubunenko M, et al. Mini-lambda: a tractable system for chromosome and BAC engineering. *Gene*. 2003;315:63-9.
4. Løbner-Olesen A, Boye E, Marinus MG. Expression of the *Escherichia coli dam* gene. *Mol Microbiol*. 1992;6(13):1841-51.
5. Morigen, Boye E, Skarstad K, Løbner-Olesen A. Regulation of chromosomal replication by DnaA protein availability in *Escherichia coli*: effects of the *datA* region. *Biochim Biophys Acta*. 2001;1521(1-3):73-80.
6. Datta S, Costantino N, Court DL. A set of recombineering plasmids for gram-negative bacteria. *Gene*. 2006;379:109-15.
7. Datsenko KA, Wanner BL. One-step inactivation of chromosomal genes in *Escherichia coli* K-12 using PCR products. *Proc Natl Acad Sci U S A*. 2000;97(12):6640-5.

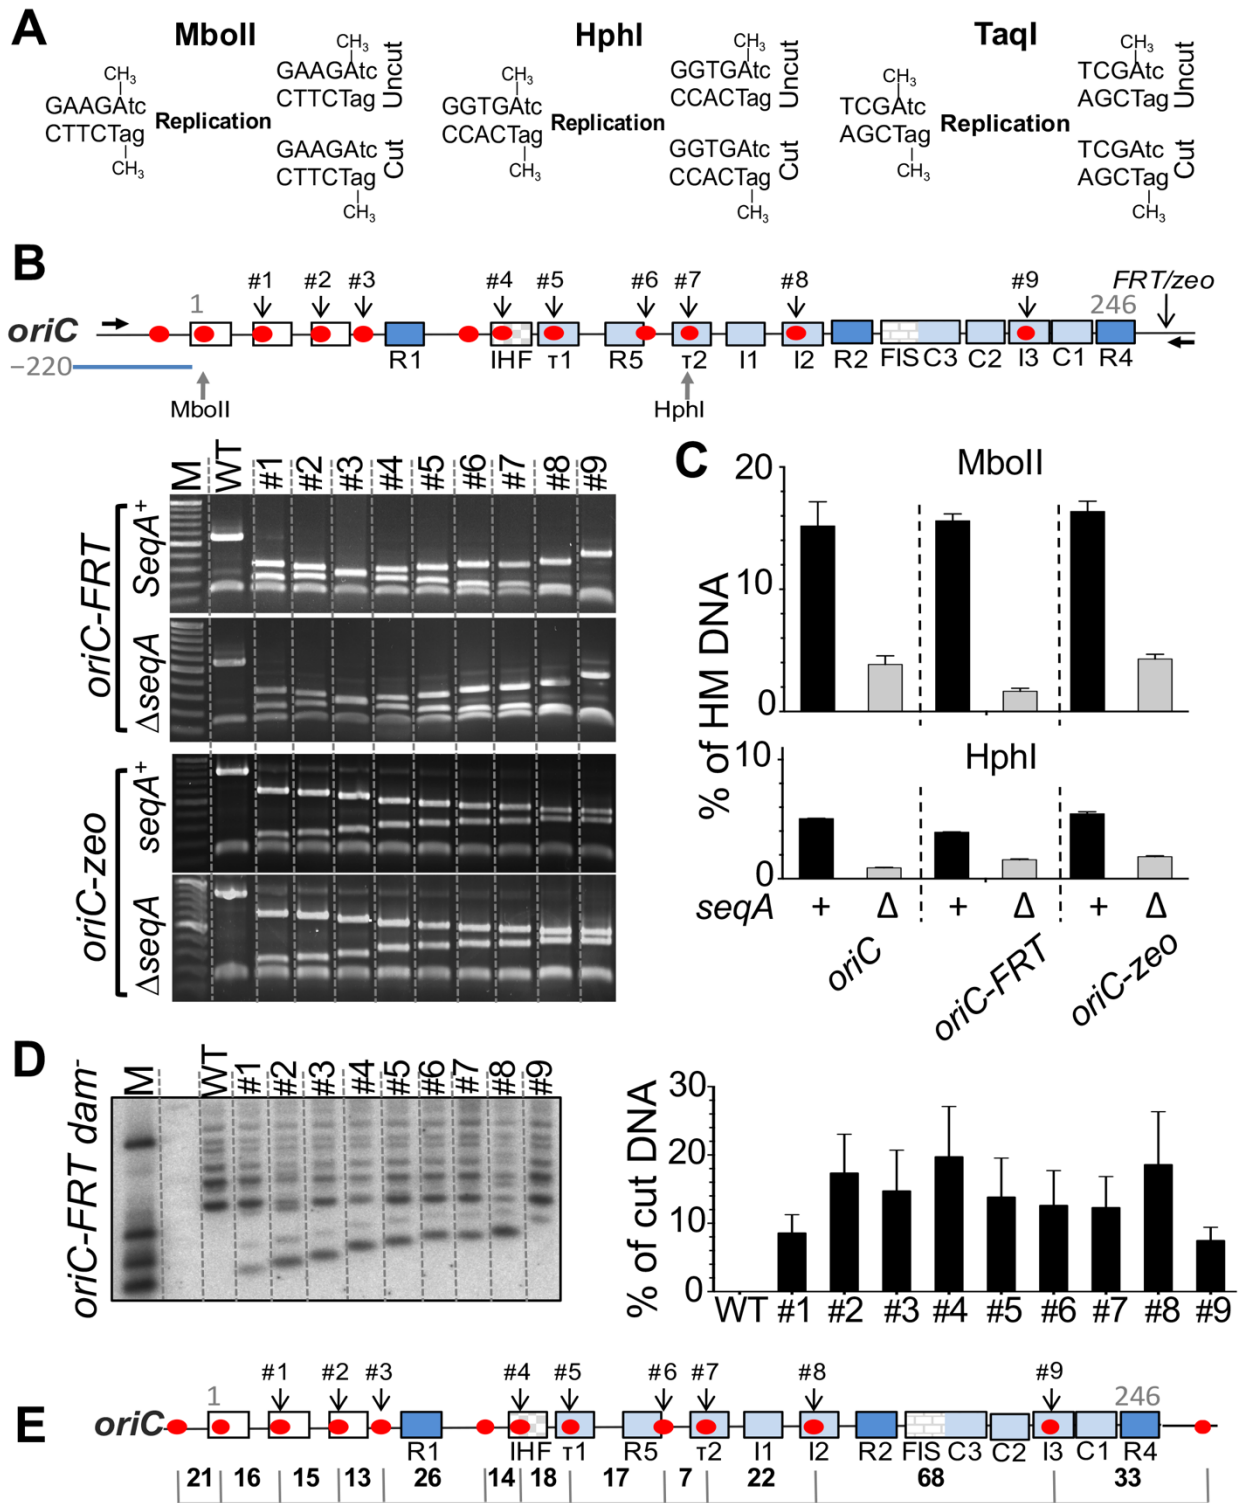

**Figure A. Construction of strains with TaqI sites overlapping the GATC sites within *oriC*.** (A) Restriction sites used for HM DNA analysis. Recognition sequences (in capital letters) of enzymes MboII and HphI naturally occur within *oriC*, and of TaqI were created in this study to overlap with the GATC

sites. When fully methylated the sites resist enzyme digestion. Upon replication, one of the two sister sites become sensitive to digestion, the one in which the methylated adenine falls outside of the enzyme recognition sequence. (B) Schematic map of *oriC* as in Fig 1B marked with either an FRT site or a zeo cassette, inserted 27 bp away from the end of the R4 site. The primers (jj40+jj42) used to amplify the *oriC* region are shown by horizontal arrows at the two flanks of the origin, and the fragment used for probing Southern blots (blue line with dashed extension) at the left end of the origin is same as in Fig 2A. To verify the presence of TaqI sites, genomic DNA either FRT or Zeo marked *seqA+* and  $\Delta seqA$  cells was used to amplify the origin region by PCR, the amplified products were digested with TaqI and resolved on an 1.3% agarose gel. M represent mol. wt. markers (NEB) and WT represent cells without any TaqI site within minimal *oriC* sequence. The presence of a TaqI site is indicated if the upper band is split into two smaller bands. The change in the relative sizes of the digested bands confirm shifting positions of the TaqI site created within *oriC* in mutants #1-9. Note that PCR products are not methylated, thus are fully sensitive to TaqI digestion. (C) Comparison of HM DNA level in *oriC*, *oriC*-FRT and *oriC*-zeo strains that are either *seqA+* or  $\Delta seqA$ . The genomic DNA of the strains was digested with either MboII or HphI. Other details for probing and quantification of HM DNA were as described in Fig 2A. (D) Relative TaqI sensitivity of FRT marked genomic DNA from dam minus derivatives of *oriC* mutants #1-9. The genomic DNA was partially digested at 55<sup>0</sup>C for 10 min to monitor relative sensitivity of the TaqI sites created within *oriC* to TaqI digestion, otherwise the details are same as in Fig 2A. The band of interest (the lowest band of the gel) is generated by digestion of one TaqI site within *oriC* and the other in the left flank of *oriC*, and its intensity was quantified with respect to all other bands of the gel (the panel on the right). The mean intensity from three independent DNA preparations is shown with one standard deviation of the mean. (E) Distance (bp) separating different GATC sites of *oriC*. The distances are shown below the schematic map of *oriC* as in Fig 1B.



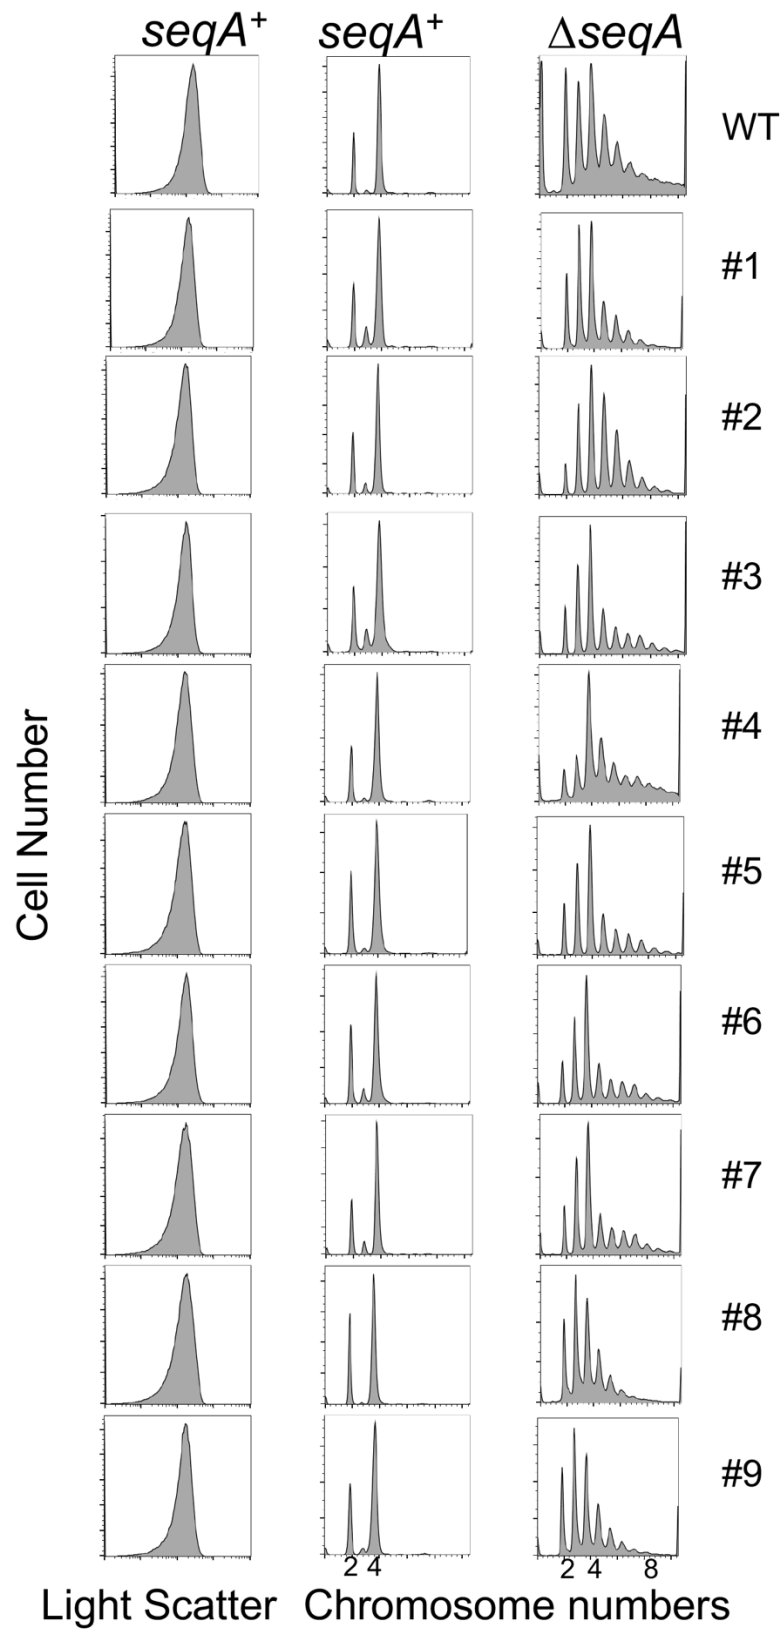

**Figure B. DNA histogram of FRT marked isogenic *seqA*<sup>+</sup> and  $\Delta$ *seqA* strains of *oriC* mutants #1-9.** These experiments were done as in Fig 3A except these cells did not have the R1 plasmids.

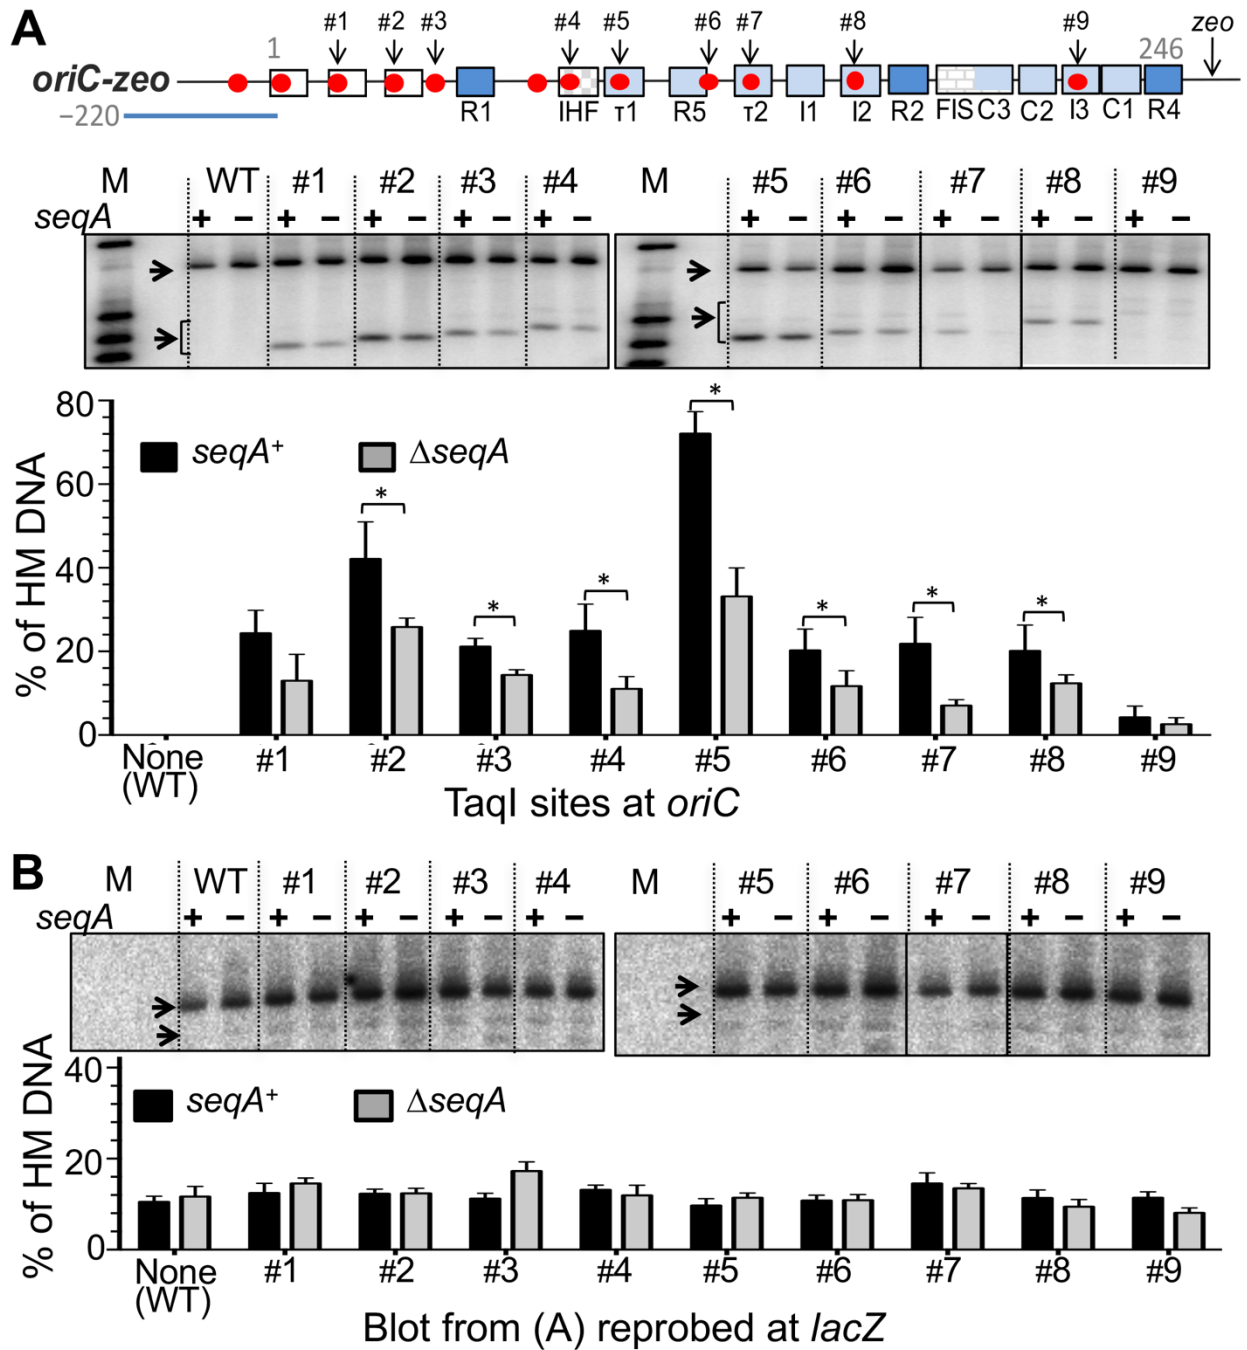

**Figure C. HM DNA level at different GATC sites of *oriC* in *seqA*<sup>+</sup> and  $\Delta$ *seqA* strains.** The experiments in (A) and (B) were done similarly to those in Fig 2 A and B, except the strains were marked with *zeo* in place of the *FRT* site.

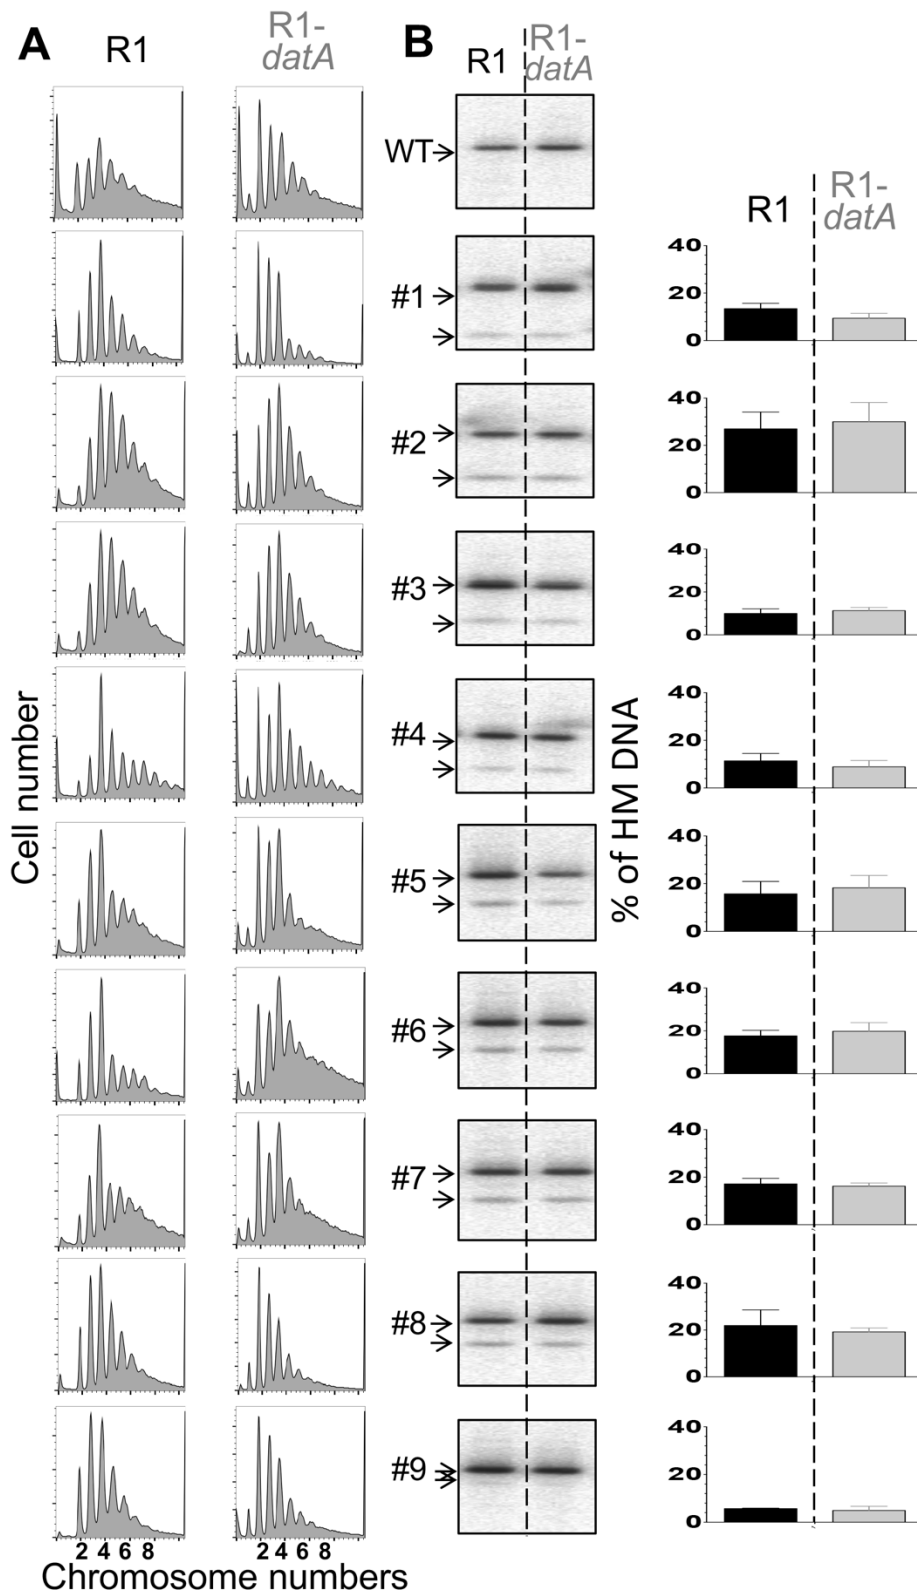

**Figure D. Effect of DnaA titration on initiation synchrony and HM DNA level at *oriC*.** The experiments in (A) and (B) were done similarly to those in Fig 3 A and B, except that the strains were  $\Delta seqA$  derivatives of those used in Fig 3.

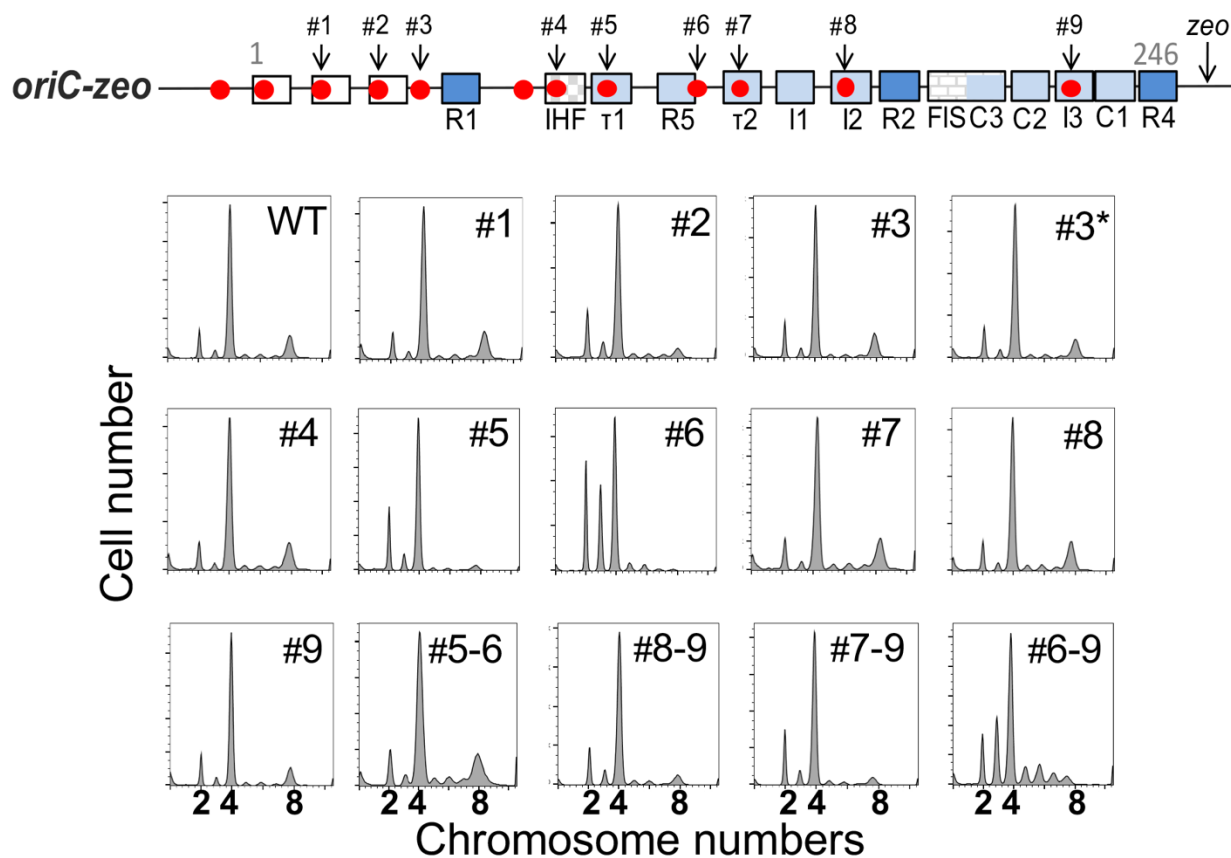

**Figure E. Overcoming of initiation defect due to a mutation in #6 GATC in R5 by GATC mutations in #5 or #7-9 GATC of *oriC*.** Chromosome contents of the GATC mutants were determined as in Fig 4A, except that CAA concentration was 0.5% instead of 0.1%. Note that initiation becomes more efficient in the double mutant #5-6 and in the quadruple mutant #6-9 compared to the single mutant #6.
